# Supplementary material
Source: HighWire-hosted journal article supplement (https://cmaj.ca/highwire/filestream/78496/field_highwire_adjunct_files/0/201182-five-1-at.pdf)
Supplement: 201182-five-1-at.pdf [file 201182-five-1-at.pdf]

## Appendix 1 (as submitted by the authors: Supplementary table

### Selected secondary conditions to consider in an adult patient presenting with mild bleeding symptoms (1-8)

|                                                                                                                                                                                                                                                                                                                                                                                                                                 |
|---------------------------------------------------------------------------------------------------------------------------------------------------------------------------------------------------------------------------------------------------------------------------------------------------------------------------------------------------------------------------------------------------------------------------------|
| <b>Inherited disorders:</b> Ehlers-Danlos syndrome, Hereditary Hemorrhagic Telangiectasia, Marfan's syndrome.                                                                                                                                                                                                                                                                                                                   |
| <b>Organ dysfunction:</b> Liver cirrhosis, Uremia, Severe Hypothyroidism                                                                                                                                                                                                                                                                                                                                                        |
| <b>Nutritional deficiency:</b> Vitamin C deficiency, Vitamin K deficiency                                                                                                                                                                                                                                                                                                                                                       |
| <b>Medications:</b> Antiplatelets (e.g. Aspirin, NSAIDs), Anticoagulants (e.g. Warfarin, direct oral anticoagulants), Bruton's Tyrosine Kinase inhibitor, Corticosteroids (skin atrophy and increased risk for gastrointestinal bleeding), Antiepileptics, Selective Serotonin Reuptake Inhibitors, Serotonin and Norepinephrine Reuptake Inhibitors, Caplacizumab, Omega 3, Garlic, Ginger, Ginkgo, St. John's Wort, Vitamin E |
| <b>Systemic disorders:</b> Cushing's syndrome, Amyloidosis, Hyperviscosity syndrome, Disseminated Intravascular Coagulation, Thrombocytopenia (immune vs. non immune), Coagulation Factor Inhibitor (e.g. acquired hemophilia A), Acquired Von Willebrand Disease (e.g. extreme thrombocytosis in myeloproliferative disorder, Heyde Syndrome), Acquired platelet dysfunction (e.g. myelodysplastic syndrome)                   |

#### References:

1. Hussein HK, Nicolson P, Fordwor K, Lowe GC. Mild bleeding disorders: what every clinician should know. *Br J Hosp Med (Lond)*. 2017;78(12):684-710.
2. Cannizzaro E, Albisetti M, Wohlrab G, Schmutz M. Severe bleeding complications during antiepileptic treatment with valproic acid in children. *Neuropediatrics*. 2007;38(1):42-5.
3. Anglin R, Yuan Y, Moayyedi P, Tse F, Armstrong D, Leontiadis GI. Risk of upper gastrointestinal bleeding with selective serotonin reuptake inhibitors with or without concurrent nonsteroidal anti-inflammatory use: a systematic review and meta-analysis. *The American journal of gastroenterology*. 2014;109(6):811-9.
4. Shatzel JJ, Olson SR, Tao DL, McCarty OJT, Danilov AV, DeLoughery TG. Ibrutinib-associated bleeding: pathogenesis, management and risk reduction strategies. *Journal of thrombosis and haemostasis : JTH*. 2017;15(5):835-47.
5. Wong WW, Gabriel A, Maxwell GP, Gupta SC. Bleeding risks of herbal, homeopathic, and dietary supplements: a hidden nightmare for plastic surgeons? *Aesthetic surgery journal*. 2012;32(3):332-46.
6. Peyvandi F, Callewaert F. Caplacizumab for Acquired Thrombotic Thrombocytopenic Purpura. *The New England journal of medicine*. 2016;374(25):2497-8.
7. Hayward CPM. How I investigate for bleeding disorders. *Int J Lab Hematol*. 2018;40 Suppl 1:6-14.
8. Kruse-Jarres R. Acquired bleeding disorders in the elderly. *Hematology American Society of Hematology Education Program*. 2015;2015:231-6.
